# Supplementary material for: HER2 drives Mucin-like 1 to control proliferation in breast cancer cells
Source: PubMed Central journal article supplement — Oncogene. 2016 Jan 4;35(32):4225–34. doi: 10.1038/onc.2015.487 (PMC4996539; doi:10.1038/onc.2015.487), 2016-01-04
Supplement: onc2015487x1.pdf [file onc2015487x1.pdf]

**a**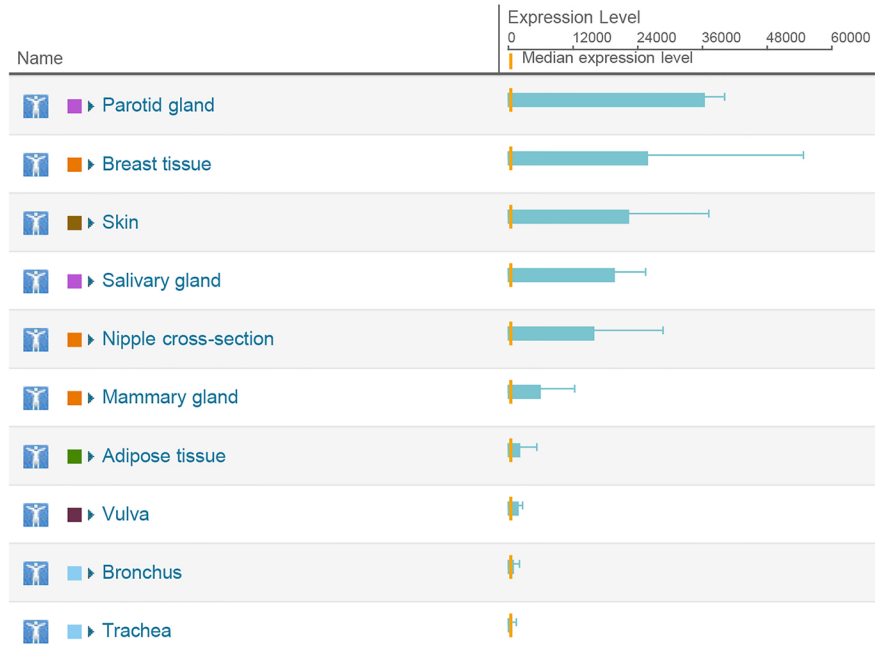**b****MUCL1 - Entrez ID: 118430**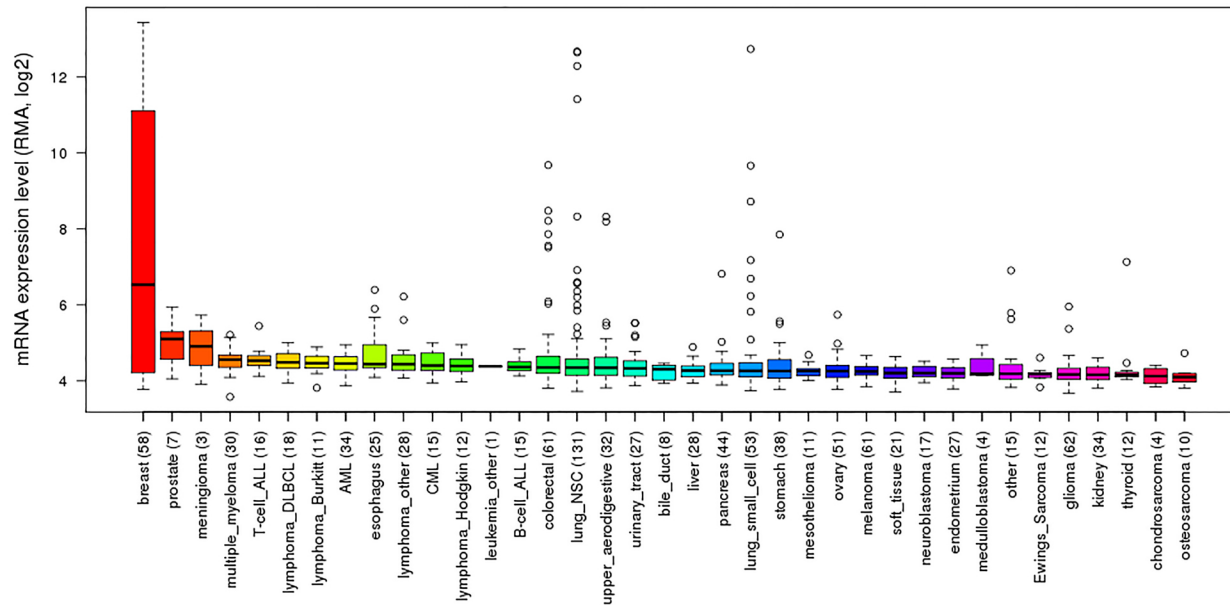**Supplemental Figure 1**

a) MUCL1 RNA expression was assessed across 147 normal human body tissues using the NextBio Body Atlas application. The ten highest expressing tissues are shown here. b) An assessment of MUCL1 RNA expression was performed across 1,036 cancer cell lines in the Broad-Novartis Cancer Cell Line Encyclopedia (CCLE). The number of cell lines included in each cancer type is listed.
