# Supplementary material for: HER2 drives Mucin-like 1 to control proliferation in breast cancer cells
Source: PubMed Central journal article supplement — Oncogene. 2016 Jan 4;35(32):4225–34. doi: 10.1038/onc.2015.487 (PMC4996539; doi:10.1038/onc.2015.487), 2016-01-04
Supplement: onc2015487x2.pdf [file onc2015487x2.pdf]

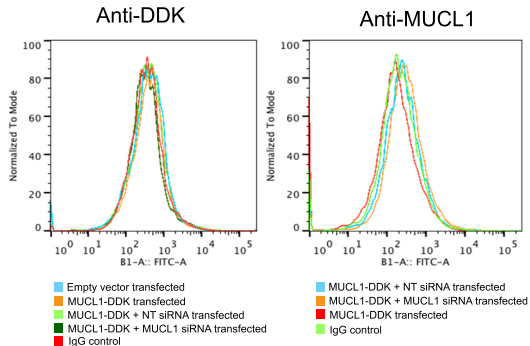

## Supplemental Figure 2

Breast cancer cell line KPL4 was transfected with either a flag-tagged MUCL1 plasmid or empty vector along with non-targeting (NT) control siRNA or MUCL1 siRNA. After 48h, live cells were stained with anti-DDK or anti-MUCL1 antibodies followed by staining with a fluorescently-labeled secondary antibody and analyzed by flow cytometry. No shift in fluorescence was detected in cells transfected with flag-tagged MUCL1 by either antibody.
