# Supplementary material for: HER2 drives Mucin-like 1 to control proliferation in breast cancer cells
Source: PubMed Central journal article supplement — Oncogene. 2016 Jan 4;35(32):4225–34. doi: 10.1038/onc.2015.487 (PMC4996539; doi:10.1038/onc.2015.487), 2016-01-04
Supplement: onc2015487x3.pdf [file onc2015487x3.pdf]

### MUCL1 Expression in Lu Breast Ductal Breast Carcinoma

Over-expression Gene Rank: 50 (in top 1%) P-value: 1.52E-5  
 Reporter: 1553602\_at t-Test: 4.651  
 Fold Change: 5.476

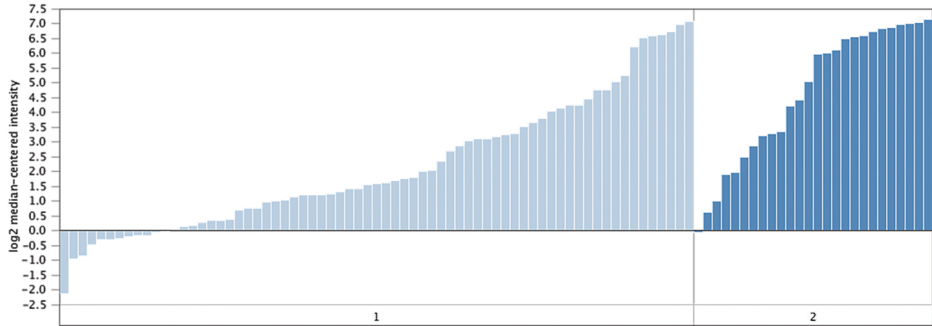

#### Legend

1. ERBB2 Negative (69) 2. ERBB2 Positive (26)

#### Lu Breast

Breast Cancer Res Treat 2008/03/01 129 samples  
 mRNA 19,574 measured genes  
 Human Genome U133 Plus 2.0 Array

### MUCL1 Expression in Gluck Breast Invasive Breast Carcinoma

Over-expression Gene Rank: 23 (in top 1%) P-value: 1.03E-5  
 Reporter: 26780 t-Test: 4.645  
 Fold Change: 4.544

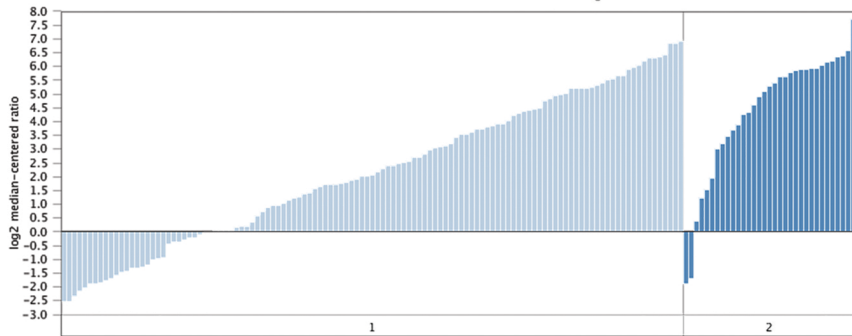

#### Legend

1. ERBB2 Negative (119) 2. ERBB2 Positive (33)

#### Gluck Breast

Breast Cancer Res Treat 2011/03/04 158 samples  
 mRNA 17,862 measured genes  
 Platform not pre-defined in Oncomine

### MUCL1 Expression in Kao Breast Breast Carcinoma

Over-expression Gene Rank: 157 (in top 1%) P-value: 1.28E-8  
 Reporter: 1553602\_at t-Test: 5.946  
 Fold Change: 3.953

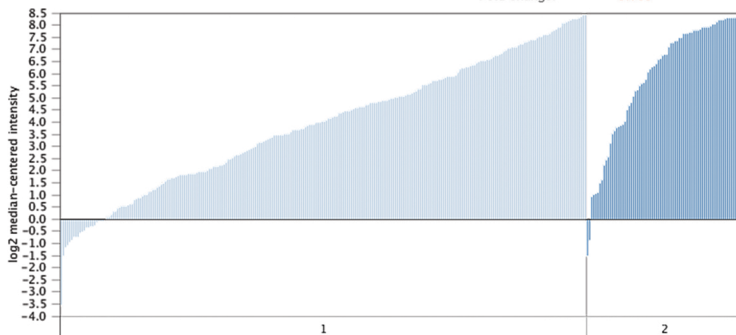

#### Legend

1. ERBB2 Negative (252) 2. ERBB2 Positive (75)

#### Kao Breast

BMC Cancer 2011/04/18 327 samples  
 mRNA 19,574 measured genes  
 Human Genome U133 Plus 2.0 Array
