# Supplementary material for: HER2 drives Mucin-like 1 to control proliferation in breast cancer cells
Source: PubMed Central journal article supplement — Oncogene. 2016 Jan 4;35(32):4225–34. doi: 10.1038/onc.2015.487 (PMC4996539; doi:10.1038/onc.2015.487), 2016-01-04
Supplement: onc2015487x4.pdf [file onc2015487x4.pdf]

## RNA expression following lapatinib treatment

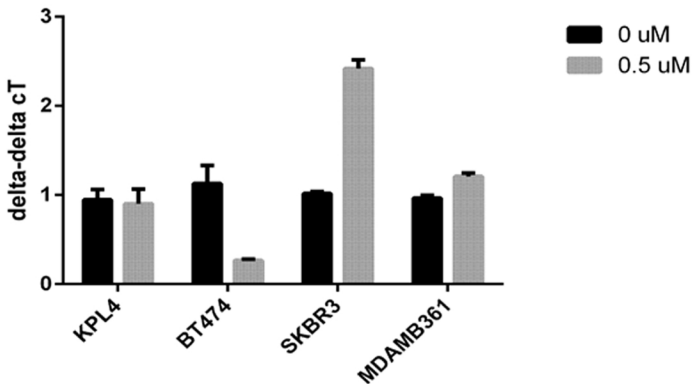

### Supplemental Figure 4

RNA was extracted from breast cancer cell lines following a 48h treatment with lapatinib. MUCL1 expression levels were measured by RT-PCR using MUCL1 specific TaqMan primer/probe set spanning exons.
