# Supplementary material for: HER2 drives Mucin-like 1 to control proliferation in breast cancer cells
Source: PubMed Central journal article supplement — Oncogene. 2016 Jan 4;35(32):4225–34. doi: 10.1038/onc.2015.487 (PMC4996539; doi:10.1038/onc.2015.487), 2016-01-04
Supplement: onc2015487x5.pdf [file onc2015487x5.pdf]

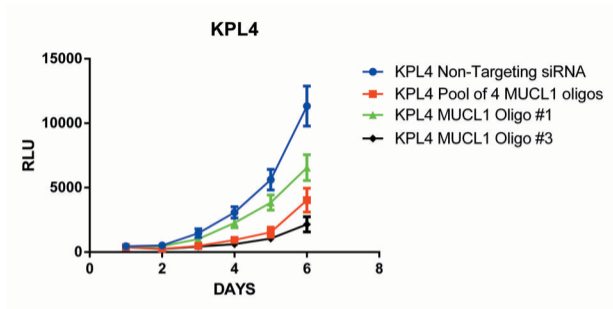

### Supplemental Figure 5

Breast cancer cell lines were transfected with non-targeting (NT) control siRNA, pooled MUCL1 oligos, or single MUCL1 oligos. Cell proliferation was assessed every day for 1 week by Cell Titer Glo Assay. Oligo #3 was used for all subsequent MUCL1 knockdown experiments.
