# Supplementary material for: HER2 drives Mucin-like 1 to control proliferation in breast cancer cells
Source: PubMed Central journal article supplement — Oncogene. 2016 Jan 4;35(32):4225–34. doi: 10.1038/onc.2015.487 (PMC4996539; doi:10.1038/onc.2015.487), 2016-01-04
Supplement: onc2015487x6.pdf [file onc2015487x6.pdf]

## Antibodies

## Cell Lines

| Protein         | Catalog # | Company                   | Location           | Cell Line      | Media          | Company | Additives                   |
|-----------------|-----------|---------------------------|--------------------|----------------|----------------|---------|-----------------------------|
| MUCL1           | HPA039093 | Sigma-Aldrich             | St Louis, MO       | JIMT-1         | DMEM           | Gibco   | 10% FBS                     |
| MUCL1           | PAB23510  | Abnova                    | Walnut, CA         | KPL-4          | DMEM           | Gibco   | 10% FBS                     |
| MUCL1           | ARP45553  | Aviva                     | San Diego, CA      | MDA-MB-134-VI  | DMEM           | Gibco   | 10% FBS                     |
| Cyclin D1       | 2926      | Cell Signaling Technology | Beverly, MA        | MDA-MB-175-VII | DMEM           | Gibco   | 10% FBS                     |
| Cyclin D3       | 2936      | Cell Signaling Technology | Beverly, MA        | MDA-MB-361     | DMEM           | Gibco   | 10% FBS                     |
| Cdk2            | 2546      | Cell Signaling Technology | Beverly, MA        | MDA-MB-415     | DMEM           | Gibco   | 10% FBS                     |
| Cdk4            | 2906      | Cell Signaling Technology | Beverly, MA        | MDA-MB-468     | DMEM           | Gibco   | 10% FBS                     |
| p18             | 2896      | Cell Signaling Technology | Beverly, MA        | HEK-293        | DMEM           | Gibco   | 10% FBS                     |
| p21             | 2947      | Cell Signaling Technology | Beverly, MA        | DU4475         | RPMI-1640      | Gibco   | 10% FBS                     |
| p27             | 2552      | Cell Signaling Technology | Beverly, MA        | HCC1419        | RPMI-1640      | Gibco   | 10% FBS                     |
| Rb              | 9309      | Cell Signaling Technology | Beverly, MA        | HCC1428        | RPMI-1640      | Gibco   | 10% FBS                     |
| phospho-Rb      | 9307      | Cell Signaling Technology | Beverly, MA        | HCC1954        | RPMI-1640      | Gibco   | 10% FBS                     |
| FAK             | 3285      | Cell Signaling Technology | Beverly, MA        | HCC202         | RPMI-1640      | Gibco   | 10% FBS                     |
| phospho-FAK     | 8556      | Cell Signaling Technology | Beverly, MA        | HCC70          | RPMI-1640      | Gibco   | 10% FBS                     |
| MKK4            | 9152      | Cell Signaling Technology | Beverly, MA        | HCC38          | RPMI-1640      | Gibco   | 10% FBS                     |
| phospho-MKK4    | 4514      | Cell Signaling Technology | Beverly, MA        | HCC1937        | RPMI-1640      | Gibco   | 10% FBS                     |
| phospho-MKK7    | 4171      | Cell Signaling Technology | Beverly, MA        | ZR-75-1        | RPMI-1640      | Gibco   | 10% FBS                     |
| JNK             | 9252      | Cell Signaling Technology | Beverly, MA        | ZR-75-30       | RPMI-1640      | Gibco   | 10% FBS                     |
| phospho-JNK     | 4668      | Cell Signaling Technology | Beverly, MA        | NCIH460        | RPMI-1640      | Gibco   | 10% FBS                     |
| c-Jun           | 9165      | Cell Signaling Technology | Beverly, MA        | NCIH520        | RPMI-1640      | Gibco   | 10% FBS                     |
| phospho-c-Jun   | 2361      | Cell Signaling Technology | Beverly, MA        | SK-BR-3        | McCoy's 5a     | Gibco   | 10% FBS                     |
| phospho-AKT     | 4060      | Cell Signaling Technology | Beverly, MA        | BT474          | DMEM/Ham's F12 | Gibco   | 10% FBS                     |
| ERK 1/2         | 4695      | Cell Signaling Technology | Beverly, MA        | MCF-7          | EMEM           | ATCC    | 10% FBS, 0.01 mg/ml Insulin |
| phospho-ERK 1/2 | 9101      | Cell Signaling Technology | Beverly, MA        |                |                |         |                             |
| EGFR            | 2232      | Cell Signaling Technology | Beverly, MA        |                |                |         |                             |
| phospho-HER2    | 06-229    | Millipore                 | Darmstadt, Germany |                |                |         |                             |
| Actin           | sc-1616   | Santa Cruz Biotechnology  | Dallas, TX         |                |                |         |                             |

### Supplemental Figure 6

### Antibody and Cell Line Information

All Cell lines were obtained from American Type Culture Collection (ATCC, Manassas, VA).

Cell line authentication was conducted by STR-based DNA fingerprinting and multiplex PCR.
